# Supplementary material for: Systematic exploration of N,C coordination effects on the ORR performance of Mn–Nx doped graphene catalysts based on DFT calculations
Source: Royal Society of Chemistry journal article supplement (doi:10.1039/c9cp02155h), 2019-01-01
Supplement: c9cp02155h1.pdf [file c9cp02155h1.pdf]

Systematic exploration of N, C coordination effects on the ORR performance of

Mn-N<sub>x</sub> doped graphene catalysts based on DFT calculations

Guangqi Zhu<sup>1</sup>, Fan Liu<sup>1</sup>, Yicheng Wang<sup>1</sup>, Zidong Wei<sup>2</sup>, Wei Wang<sup>1\*,3</sup>

<sup>1</sup>*School of Chemical Engineering and Technology, Tianjin University, Tianjin 300072, China*

<sup>2</sup>*College of Chemistry and Chemical Engineering, Chongqing University, Chongqing  
400044, China*

<sup>3</sup>*Key Laboratory of Metal Fuel Cell of Sichuan Province, Deyang 618019, Sichuan, China*

Electronic Supplementary Information: Fig. S1-S3; Table S1-S7.

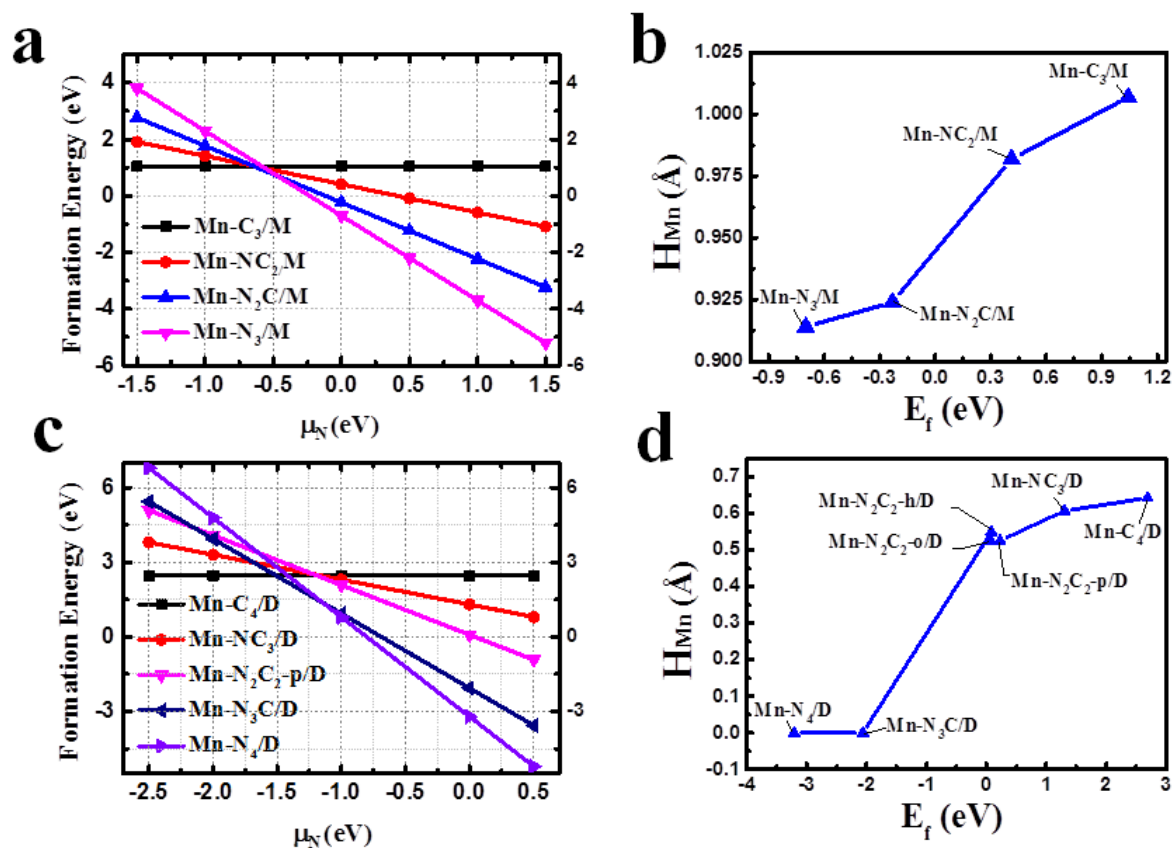

**Fig. S1** The relations between (a, c) the  $\Delta E_f$  of various Mn-N<sub>x</sub> sites and the chemical potential of nitrogen ( $\mu_N$ ) respect to the one-half energy of the N<sub>2</sub> molecule, the  $\mu_N$  varies with different nitrogen precursors defined; (b, d) the  $\Delta E_f$  and the height of Mn atom respect to graphene basal plane ( $H_{Mn}$ ).

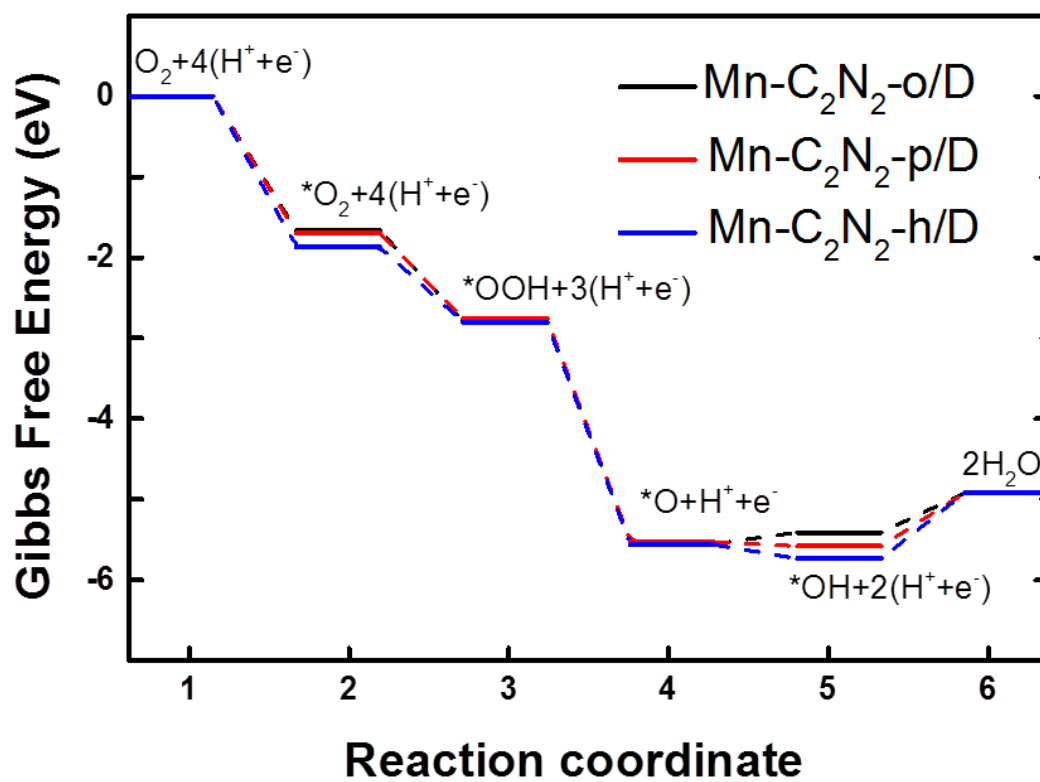

**Fig. S2** The free energy diagrams of ORR pathways on the three types of Mn-N<sub>2</sub>C<sub>2</sub>/D structures.

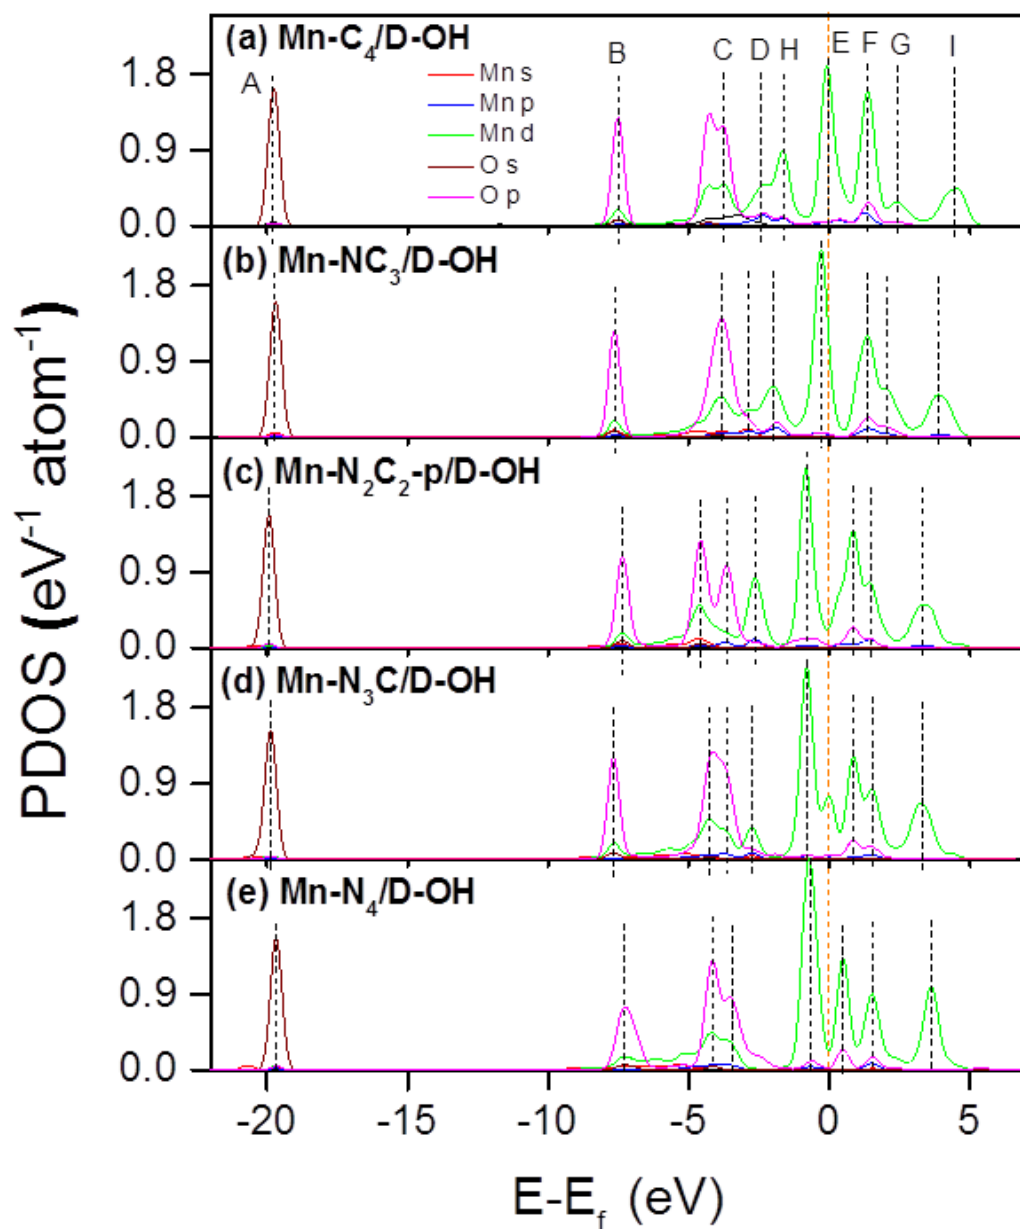

**Fig. S3** The partial density of states (PDOS) plots calculated for various types of  $\text{Mn-N}_y\text{C}_{4-y}$  ( $y = 0-4$ ) configurations after the  $^*\text{OH}$  adsorption.

**Table S1** Optimized Models of different Mn-N<sub>x</sub> configurations and their corresponding ideal \*O<sub>2</sub>, \*OOH, \*O and \*OH adsorption configurations

| Structure                                              |      | Pristine                                                                            | *O <sub>2</sub>                                                                     | *OOH                                                                                 | *O                                                                                    | *OH                                                                                   |
|--------------------------------------------------------|------|-------------------------------------------------------------------------------------|-------------------------------------------------------------------------------------|--------------------------------------------------------------------------------------|---------------------------------------------------------------------------------------|---------------------------------------------------------------------------------------|
| Mn-C <sub>3</sub> /M                                   | Top  | 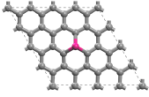   |    |    |    |    |
|                                                        | side |    |    |    |    |    |
| Mn-NC <sub>2</sub> /M                                  | Top  |    |    |    |    |    |
|                                                        | side |    |    |    |    |    |
| Mn-N <sub>2</sub> C/M                                  | Top  |    |    |    |    |    |
|                                                        | side |  |  |  |  |  |
| Mn-N <sub>3</sub> /M                                   | Top  |  |  |  |  |  |
|                                                        | side |  |  |  |  |  |
| Mn-C <sub>4</sub> /D                                   | Top  |  |  |  |  |  |
|                                                        | side |  |  |  |  |  |
| Mn-NC <sub>3</sub> /D                                  | Top  |  |  |  |  |  |
|                                                        | side |  |  |  |  |  |
| <sup>a</sup> Mn-N <sub>2</sub> C <sub>2</sub> -o<br>/D | Top  |  |  |  |  |  |
|                                                        | side |  |  |  |  |  |
| <sup>a</sup> Mn-N <sub>2</sub> C <sub>2</sub> -p<br>/D | Top  |  |  |  |  |  |

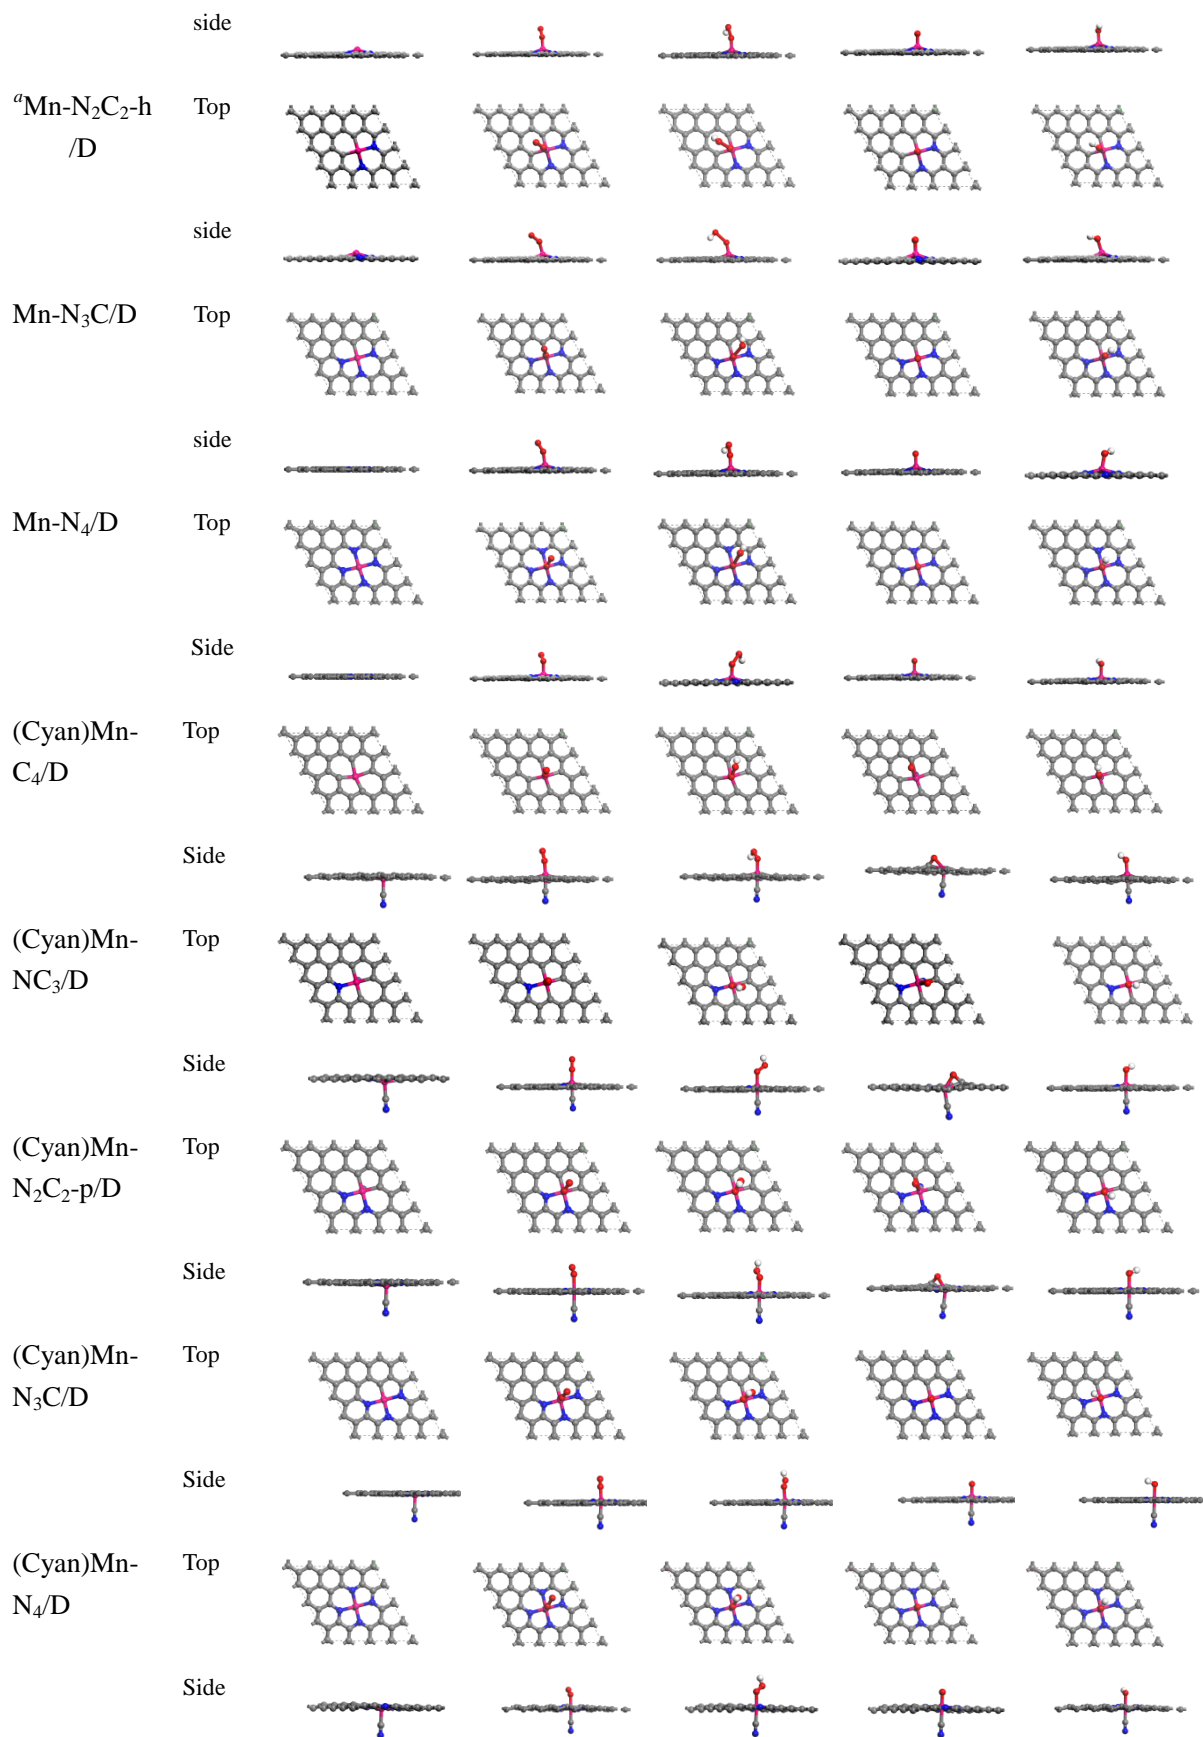

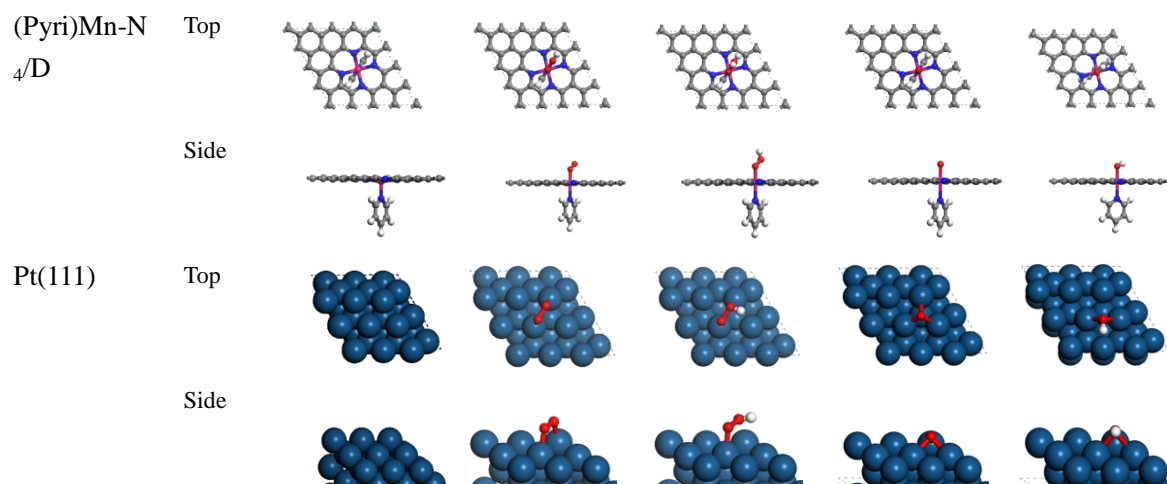


---

<sup>a</sup>For Mn-N<sub>2</sub>C<sub>2</sub>/D, three configurations were considered: Mn center, two N atoms and two C atoms compose a pentatomic ring (Mn-N<sub>2</sub>C<sub>2</sub>-p/D); two N atoms are located at the opposite sides of Mn (Mn-N<sub>2</sub>C<sub>2</sub>-o/D); Mn center, two N atoms and three C atoms compose a hexatomic ring (Mn-N<sub>2</sub>C<sub>2</sub>-h/D).

**Table S2** Adsorption free energies ( $\Delta G_{\text{ads}}$ , eV) of the key ORR intermediate species on the surface sites associated with various TM-N<sub>x</sub> structures and Pt (111).

| structures           | $\Delta G_{*O_2}$ | $\Delta G_{*OOH}$ | $\Delta G_{*O}$ | $\Delta G_{*OH}$ |
|----------------------|-------------------|-------------------|-----------------|------------------|
| Fe-N <sub>4</sub> /D | 4.101             | 3.536             | 1.487           | 0.394            |
| Ni-N <sub>4</sub> /D | 5.324             | 4.743             | 3.564           | 1.580            |
| Zn-N <sub>4</sub> /D | 5.306             | 4.058             | 3.364           | 1.430            |
| Cu-N <sub>4</sub> /D | 5.000             | 4.678             | 3.351           | 1.446            |
| Pt-N <sub>4</sub> /D | 5.844             | 5.115             | 4.298           | 2.112            |
| Pt (111)             | 5.100             | 4.030             | 2.218           | 0.905            |



**Table S3** Free energy variations of the ORR pathways for different TM-N<sub>x</sub> structures and their corresponding theoretical overpotentials

| Structures                                 | Free energy variation (eV) |              |              |              |              | $\eta_{\text{SHE}}$ (V) |
|--------------------------------------------|----------------------------|--------------|--------------|--------------|--------------|-------------------------|
|                                            | $\Delta G_1$               | $\Delta G_2$ | $\Delta G_3$ | $\Delta G_4$ | $\Delta G_5$ |                         |
| Mn-C <sub>3</sub> /M                       | -1.864                     | -0.588       | -2.225       | -1.224       | 0.981        | 2.21                    |
| Mn-NC <sub>2</sub> /M                      | -2.390                     | -0.484       | -2.325       | -0.875       | 1.154        | 2.38                    |
| Mn-N <sub>2</sub> C/M                      | -2.532                     | -0.350       | -2.684       | -0.519       | 1.165        | 2.39                    |
| Mn-N <sub>3</sub> /M                       | -2.897                     | -2.032       | -1.014       | -0.314       | 1.337        | 2.56                    |
| Mn-C <sub>4</sub> /D                       | -1.266                     | -0.904       | -2.890       | -0.091       | 0.231        | 1.46                    |
| Mn-NC <sub>3</sub> /D                      | -1.498                     | -0.791       | -3.096       | -0.085       | 0.550        | 1.78                    |
| Mn-N <sub>2</sub> C <sub>2</sub> -o/D      | -1.669                     | -1.124       | -2.759       | 0.140        | 0.492        | 1.72                    |
| Mn-N <sub>2</sub> C <sub>2</sub> -p/D      | -1.703                     | -1.056       | -2.772       | -0.048       | 0.659        | 1.88                    |
| Mn-N <sub>2</sub> C <sub>2</sub> -h/D      | -1.871                     | -0.934       | -2.758       | -0.172       | 0.815        | 2.04                    |
| Mn-N <sub>3</sub> C/D                      | -0.860                     | -1.002       | -2.63        | 0.015        | -0.443       | 1.24                    |
| Mn-N <sub>4</sub> /D                       | -0.808                     | -0.994       | -2.384       | -0.282       | -0.452       | 0.94                    |
| (Cyan)Mn-C <sub>4</sub> /D                 | -0.367                     | -0.762       | -2.91        | -0.614       | -0.267       | 0.96                    |
| (Cyan)Mn-NC <sub>3</sub> /D                | -0.220                     | -0.527       | -3.011       | -0.283       | -0.879       | 0.94                    |
| Cyan)Mn-N <sub>2</sub> C <sub>2</sub> -p/D | -0.063                     | -1.062       | -2.782       | -0.770       | -0.243       | 0.98                    |
| (Cyan)Mn-N <sub>3</sub> C/D                | -0.042                     | -0.964       | -2.257       | -1.23        | -0.427       | 0.80                    |
| (Cyan)Mn-N <sub>4</sub> /D                 | -0.026                     | -0.895       | -2.113       | -0.897       | -0.989       | 0.33                    |
| (Pyri)Mn-N <sub>4</sub> /D                 | -0.766                     | -0.674       | -2.369       | -0.64        | -0.471       | 0.75                    |
| Fe-N <sub>4</sub> /D                       | -0.819                     | -0.565       | -2.049       | -1.093       | -0.394       | 0.83                    |
| Ni-N <sub>4</sub> /D                       | 0.404                      | -0.581       | -1.179       | -1.984       | -1.58        | 1.05                    |
| Zn-N <sub>4</sub> /D                       | 0.386                      | -1.248       | -0.694       | -1.934       | -1.43        | 0.53                    |
| Cu-N <sub>4</sub> /D                       | 0.08                       | -0.322       | -1.327       | -1.905       | -1.446       | 0.98                    |
| Pt-N <sub>4</sub> /D                       | 0.924                      | -0.729       | -0.817       | -2.186       | -2.112       | 1.42                    |
| Pt(111)                                    | 0.18                       | -1.07        | -1.812       | -1.313       | -0.905       | 0.34                    |

**Table S4** The O<sub>2</sub> adsorption configurations in different binding types associated with the Mn-N<sub>y</sub>C<sub>4-y</sub>/D (y = 0-4) and Mn-N<sub>x</sub>C<sub>3-x</sub>/M (x = 0-3) structures.

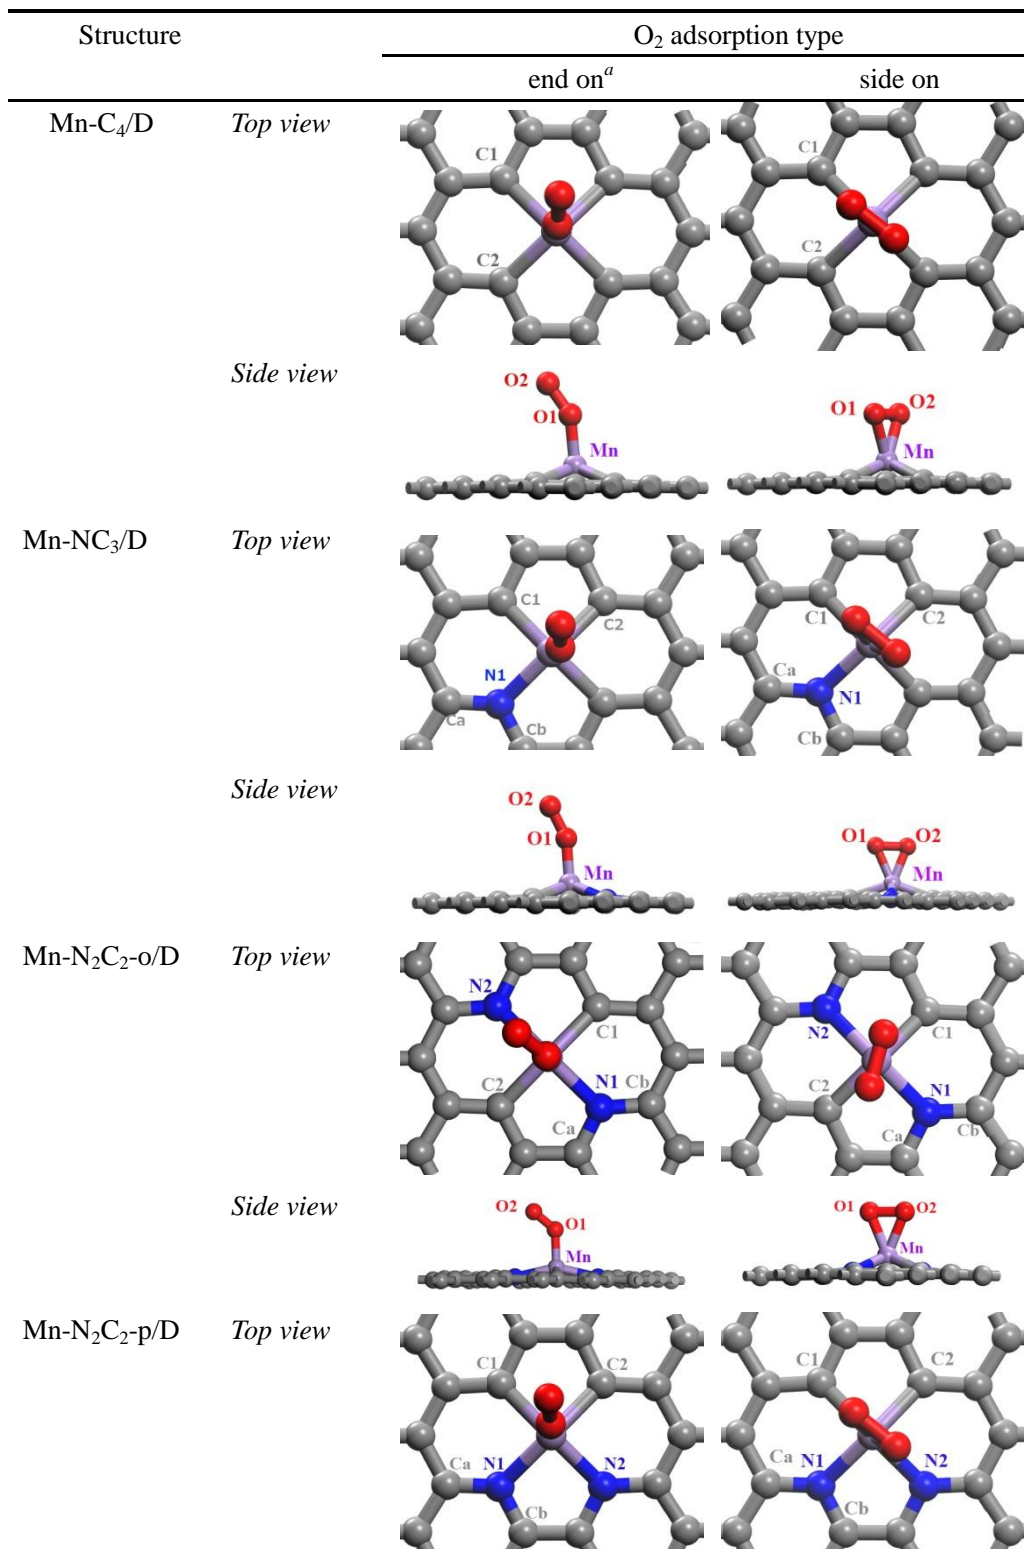

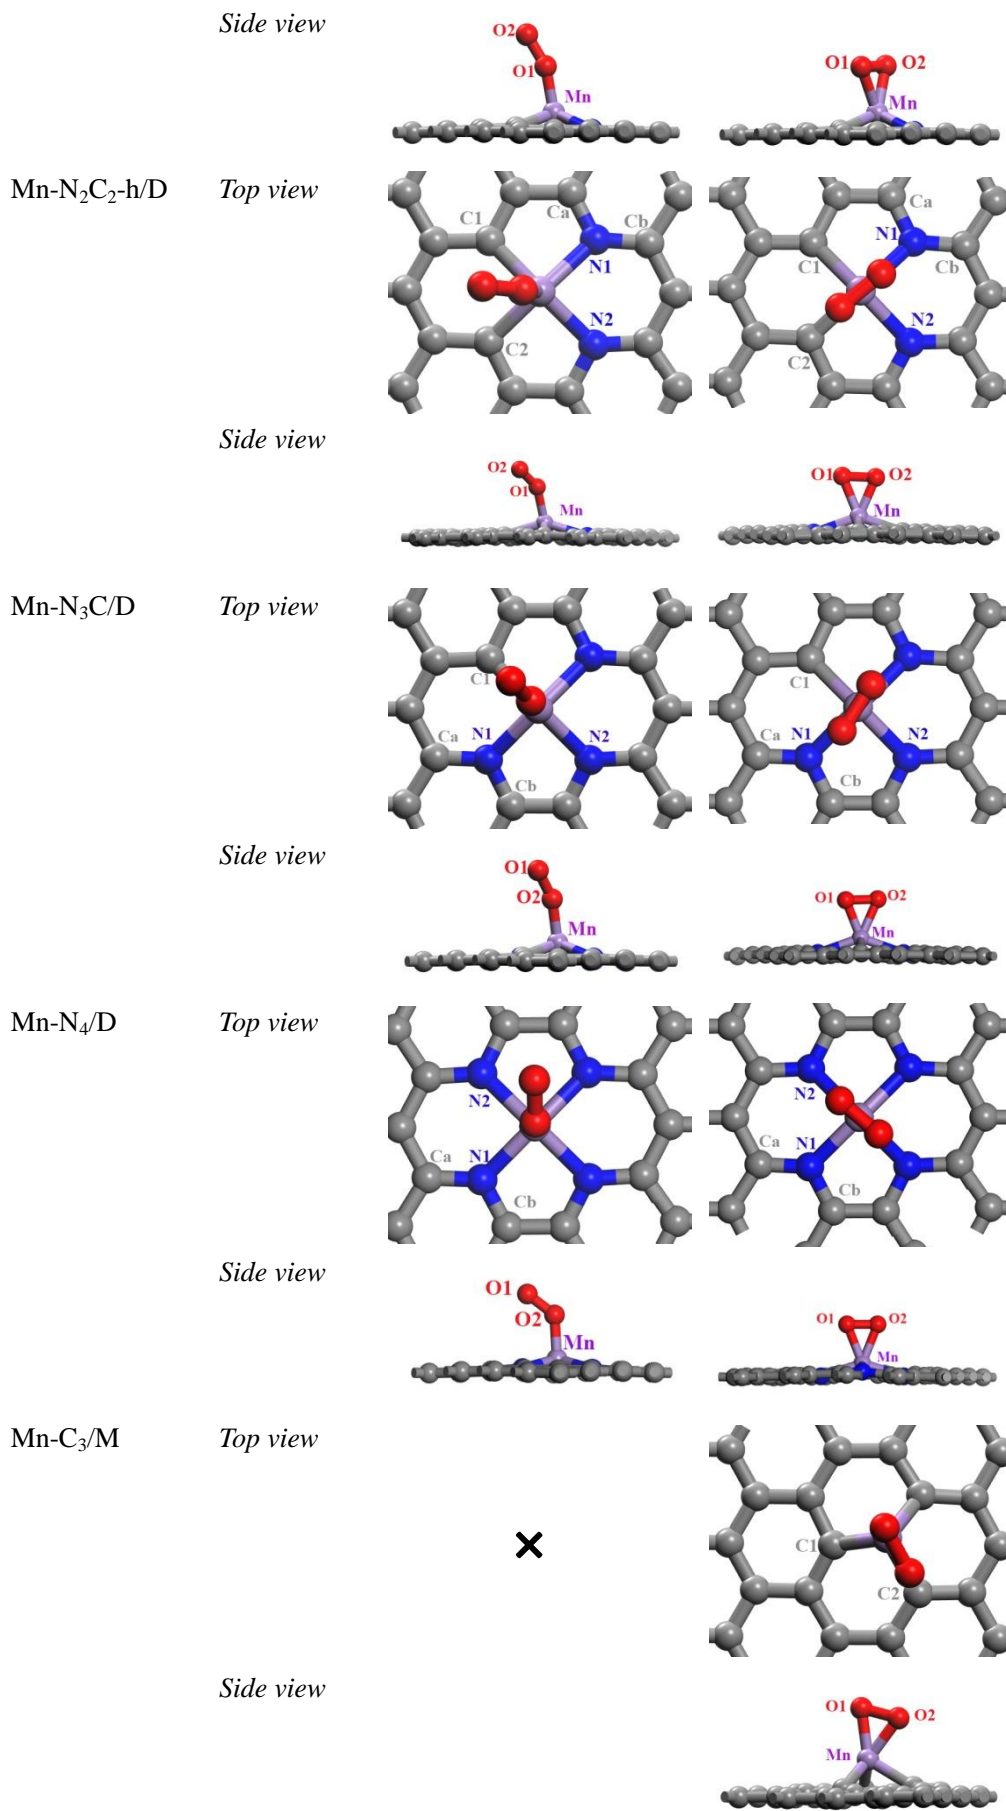

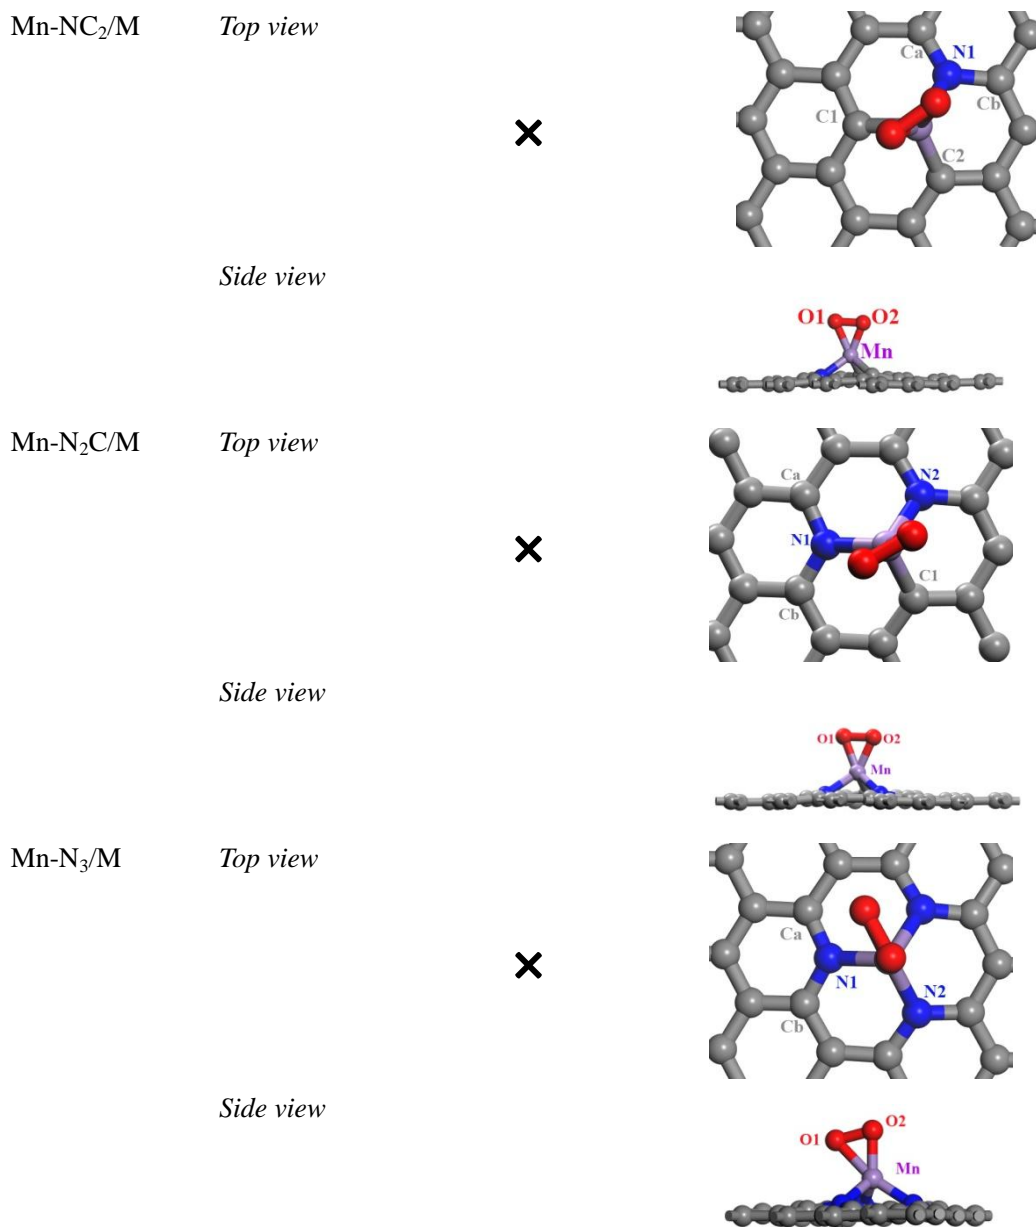

<sup>a</sup>(×) No stable O<sub>2</sub>-end on adsorption configuration was obtained after geometric optimization for Mn-N<sub>x</sub>C<sub>3-x</sub>/M(x = 0-3) structures.

**Table S5.** Binding energy ( $E_b$ ) of  $O_2$  in different binding types, the atomic distance between Mn, C, N, O atoms ( $d$ , Å) and the height of Mn atom ( $H_{Mn}$ , Å) respect to the graphene basal plane of each Mn- $N_x$  site after  $*O_2$  adsorption. The positive and negative values in the brackets represent the increase and reduction in  $d$  or  $H_{Mn}$  after  $*O_2$  adsorption, respectively. The Mn, N1, C1, O1 and O2 atoms correspond to Table S4.

| Structure                             | $*O_2$ type    | ${}^a E_b$ /eV | Distance / Å |             |             |              |              |               |
|---------------------------------------|----------------|----------------|--------------|-------------|-------------|--------------|--------------|---------------|
|                                       |                |                | $d_{O1-O2}$  | $d_{Mn-O1}$ | $d_{Mn-O2}$ | $d_{Mn-C1}$  | $d_{Mn-N1}$  | $H_{Mn}$      |
| Mn-C <sub>4</sub> /D                  | <i>end-on</i>  | -1.72          | 1.298        | 1.723       | -           | 2.008(0.011) | -            | 0.596(-0.047) |
|                                       | <i>side-on</i> | -2.28          | 1.416        | 1.825       | 1.825       | 2.015(0.018) | -            | 0.696(0.053)  |
| Mn-C <sub>3</sub> N/D                 | <i>end-on</i>  | -1.73          | 1.298        | 1.665       | -           | 1.986(0.006) | 2.028(0.013) | 0.578(-0.03)  |
|                                       | <i>side-on</i> | -2.24          | 1.423        | 1.822       | 1.855       | 1.986(0.006) | 2.056(0.041) | 0.682(0.074)  |
| Mn-C <sub>2</sub> N <sub>2</sub> -o/D | <i>end-on</i>  | -2.11          | 1.302        | 1.657       | -           | 1.952(0.002) | 2.009(0.03)  | 0.58(0.056)   |
|                                       | <i>side-on</i> | -2.34          | 1.441        | 1.857       | 1.856       | 1.966(0.016) | 2.029(0.05)  | 0.666(0.142)  |
| Mn-C <sub>2</sub> N <sub>2</sub> -p/D | <i>end-on</i>  | -2.17          | 1.302        | 1.658       | -           | 1.96(-0.004) | 2.011(0.036) | 0.589(0.063)  |
|                                       | <i>side-on</i> | -2.42          | 1.417        | 1.873       | 1.839       | 1.984(0.022) | 2.028(0.053) | 0.604(0.078)  |
| Mn-C <sub>2</sub> N <sub>2</sub> -h/D | <i>end-on</i>  | -2.39          | 1.304        | 1.706       | -           | 2.045(0.102) | 1.96(-0.04)  | 0.598(0.048)  |
|                                       | <i>side-on</i> | -2.69          | 1.431        | 1.87        | 1.825       | 2.04(0.097)  | 1.97(-0.028) | 0.697(0.147)  |
| Mn-CN <sub>3</sub> /D                 | <i>end-on</i>  | -1.41          | 1.309        | 1.665       | -           | 1.917(0.013) | 1.998(0.054) | 0.580(0.580)  |
|                                       | <i>side-on</i> | -1.68          | 1.454        | 1.882       | 1.811       | 1.944(0.04)  | 2.203(0.259) | 0.680(0.680)  |
| Mn-N <sub>4</sub> /D                  | <i>end-on</i>  | -1.32          | 1.328        | 1.712       | -           | --           | 1.945(0.029) | 0.385(0.385)  |
|                                       | <i>side-on</i> | -1.45          | 1.394        | 1.877       | 1.884       | -            | 1.959(0.043) | 0.479(0.479)  |
| Mn-C <sub>3</sub> /M                  | <i>side-on</i> | -2.26          | 1.417        | 1.842       | 1.838       | 1.855(0.026) | -            | 1.062(0.055)  |
| Mn-C <sub>2</sub> N/M                 | <i>side-on</i> | -2.74          | 1.43         | 1.872       | 1.787       | 1.835(0.015) | 1.875(0.046) | 1.039(0.057)  |
| Mn-CN <sub>2</sub> /M                 | <i>side-on</i> | -3.05          | 1.442        | 1.838       | 1.828       | 1.80(-0.001) | 1.864(0.054) | 1.018(0.094)  |
| Mn-N <sub>3</sub> /M                  | <i>side-on</i> | -3.32          | 1.448        | 1.992       | 1.759       |              | 1.847(0.034) | 0.988(0.074)  |

<sup>a</sup> $E_b$  is calculated according to equation  $E_b = E_{*O_2} - (E_{Mn-N_x} + E_{O_2})$ , where  $E_{*O_2}$ ,  $E_{Mn-N_x}$  and  $E_{O_2}$  represent the total DFT energy of the Mn- $N_x$  adsorption model, the pristine Mn- $N_x$  model and the  $O_2$  molecule.

**Table S6.** Mulliken charge population (q, e/atom) on Mn, N, C and O atoms of each Mn-N<sub>x</sub> site with an adsorbed O<sub>2</sub>. The positive and negative values in the brackets represent the loss and accumulation of electrons after \*O<sub>2</sub> adsorption, respectively. The Mn, N1, N2, Ca, Cb, C1, C2, O1 and O2 atoms correspond to Table S4.

| Structure                             | *O <sub>2</sub> type | Mulliken charge population (e/atom) |               |                |               |               |               |               |               |        |        |
|---------------------------------------|----------------------|-------------------------------------|---------------|----------------|---------------|---------------|---------------|---------------|---------------|--------|--------|
|                                       |                      | qMn                                 | Spin Mn       | qN1            | qN2           | qCa           | qCb           | qC1           | qC2           | qO1    | qO2    |
| Mn-C <sub>4</sub> /D                  | <i>end-on</i>        | 0.105(0.013)                        | 2.355(0.568)  | -              | -             | -             | -             | -0.12(0.012)  | -0.082(0.05)  | -0.173 | -0.250 |
|                                       | <i>side-on</i>       | 0.149(0.057)                        | 1.735(-0.052) | -              | -             | -             | -             | -0.087(0.045) | -0.062(0.07)  | -0.289 | -0.289 |
| Mn-C <sub>3</sub> N/D                 | <i>end-on</i>        | 0.092(0.002)                        | 0(0)          | -0.333(0.019)  | -             | 0.199(0.008)  | 0.125(0.008)  | -0.058(0.057) | -0.04(0.051)  | -0.161 | -0.275 |
|                                       | <i>side-on</i>       | 0.184(0.094)                        | 0(0)          | -0.346(0.006)  | -             | 0.194(0.003)  | 0.119(0.002)  | -0.053(0.062) | -0.043(0.048) | -0.27  | -0.278 |
| Mn-C <sub>2</sub> N <sub>2</sub> -o/D | <i>end-on</i>        | 0.193(0.054)                        | 1.696(1.696)  | -0.365(-0.002) | -0.362(0.001) | 0.2(0.01)     | 0.136(0.005)  | -0.009(0.081) | 0.005(0.095)  | -0.147 | -0.282 |
|                                       | <i>side-on</i>       | 0.265(0.126)                        | 0(0)          | -0.334(0.029)  | -0.301(0.062) | 0.189(-0.001) | 0.136(0.005)  | -0.029(0.061) | -0.012(0.078) | -0.317 | -0.287 |
| Mn-C <sub>2</sub> N <sub>2</sub> -p/D | <i>end-on</i>        | 0.137(-0.019)                       | 0(0)          | -0.327(0.036)  | -0.33(0.033)  | 0.166(0.005)  | 0.116(0.003)  | -0.032(0.079) | -0.023(0.088) | -0.154 | -0.302 |
|                                       | <i>side-on</i>       | 0.26(0.104)                         | 0(0)          | -0.3(0.063)    | -0.301(0.062) | 0.165(0.004)  | 0.112(-0.001) | -0.05(0.061)  | -0.032(0.079) | -0.305 | -0.285 |
| Mn-C <sub>2</sub> N <sub>2</sub> -h/D | <i>end-on</i>        | 0.159(0.011)                        | 0(0)          | -0.311(0.049)  | -0.32(0.04)   | 0.195(0.002)  | 0.121(0.005)  | -0.064(0.037) | -0.034(0.067) | -0.173 | -0.300 |
|                                       | <i>side-on</i>       | 0.262(0.114)                        | 0(0)          | -0.314(0.046)  | -0.313(0.047) | 0.194(0.001)  | 0.119(0.003)  | -0.025(0.076) | -0.026(0.075) | -0.328 | -0.321 |
| Mn-CN <sub>3</sub> /D                 | <i>end-on</i>        | 0.229(-0.133)                       | 0(-3.601)     | -0.315(0.076)  | -0.329(0.033) | 0.196(0.025)  | 0.138(0.03)   | 0.044(0.141)  | -             | -0.161 | -0.321 |
|                                       | <i>side-on</i>       | 0.361(-0.001)                       | 0(-3.601)     | -0.29(0.101)   | -0.318(0.044) | 0.171(0)      | 0.125(0.017)  | 0.008(0.105)  | -             | -0.358 | -0.332 |
| Mn-N <sub>4</sub> /D                  | <i>end-on</i>        | 0.342(-0.061)                       | 0(-3.264)     | -0.281(-0.115) | -0.31(-0.141) | 0.175(0.126)  | 0.129(0.091)  | -             | -             | -0.175 | -0.342 |
|                                       | <i>side-on</i>       | 0.408(0.005)                        | 0(-3.264)     | -0.27(-0.104)  | -0.31(-0.145) | 0.163(0.114)  | 0.127(0.089)  | -             | -             | -0.292 | -0.280 |
| Mn-C <sub>3</sub> /M                  | <i>side-on</i>       | 0.047(0.043)                        | 1.011(-1.492) | -              | -             | -             | -             | 0.018(0.021)  | -0.058(0.015) | -0.321 | -0.264 |
| Mn-C <sub>2</sub> N/M                 | <i>side-on</i>       | 0.139(0.118)                        | 0(-0.001)     | -0.301(0.025)  | -             | 0.152(0.02)   | 0.147(0.015)  | 0.021(0.029)  | 0.007(0.015)  | -0.346 | -0.305 |
| Mn-CN <sub>2</sub> /M                 | <i>side-on</i>       | 0.248(0.093)                        | 0(-1.173)     | -0.304(0.033)  | -0.302(0.035) | 0.16(0.007)   | 0.153(0.026)  | 0.086(0.094)  | -             | -0.358 | -0.344 |
| Mn-N <sub>3</sub> /M                  | <i>side-on</i>       | 0.379(0.119)                        | 0(0)          | -0.266(0.025)  | -0.276(0.015) | 0.183(0.032)  | 0.172(0.033)  | -             | -             | -0.385 | -0.396 |

**Table S7.** The energy level (eV) of each peak respect to the Fermi energy level ( $E_f$ ) in the PDOS plots of \*OH adsorbed on the three-coordination (Figure 8) and four-coordination (Figure S3) Mn-N<sub>x</sub> sites.

| structure                             | Energy level (eV) of each peak respect to the $E_f$ |       |       |       |       |      |      |                |      |
|---------------------------------------|-----------------------------------------------------|-------|-------|-------|-------|------|------|----------------|------|
|                                       | A                                                   | B     | C     | D     | E     | F    | G    | H              | I    |
| Mn-C <sub>3</sub> /M                  | -19.27                                              | -6.94 | -3.26 | -2.42 | 0.40  | 1.63 | 2.89 | – <sup>a</sup> | –    |
| Mn-NC <sub>2</sub> /M                 | -19.28                                              | -7.00 | -3.42 | -2.49 | -0.2  | 1.42 | 2.67 | –              | –    |
| Mn-N <sub>2</sub> C/M                 | -19.45                                              | -7.05 | -3.95 | -3.02 | -0.38 | 1.19 | 2.53 | –              | –    |
| Mn-N <sub>3</sub> /M                  | -20.16                                              | -7.83 | -4.54 | -3.66 | -1.22 | 0.46 | 1.63 | –              | –    |
| Mn-C <sub>4</sub> /D                  | -19.77                                              | -7.51 | -3.77 | -2.44 | -0.04 | 1.37 | 2.44 | -1.64          | 4.45 |
| Mn-NC <sub>3</sub> /D                 | -19.72                                              | -7.64 | -3.82 | -2.86 | -0.31 | 1.34 | 2.07 | -1.99          | 3.89 |
| Mn-N <sub>2</sub> C <sub>2</sub> -p/D | -19.92                                              | -7.34 | -4.57 | -3.66 | -0.82 | 0.84 | 1.47 | -2.59          | 3.34 |
| Mn-N <sub>3</sub> C/D                 | -19.87                                              | -7.65 | -4.15 | -3.6  | -0.79 | 0.84 | 1.54 | -2.75          | 3.31 |
| Mn-N <sub>4</sub> /D                  | -19.65                                              | -7.28 | -4.13 | -3.45 | -0.71 | 0.47 | 1.53 | –              | 3.63 |

<sup>a</sup>(–) No peaks were found in the corresponding PDOS plots.
